# Supplementary material for: The effect of the allosteric regulation on the catalytic activity of fructosyltransferase studied via molecular dynamics simulations
Source: Royal Society of Chemistry journal article supplement (doi:10.1039/d4cp04131c), 2025-01-01
Supplement: d4cp04131c1.pdf [file d4cp04131c1.pdf]

## Supporting Information

### **The allosteric regulation mechanism on the catalytic activity of fructosyltransferase studied by molecular dynamics simulations**

Chaofan Yu<sup>1</sup>, Yanqi Liu<sup>1,2</sup>, Liang Fu<sup>2</sup>, Zhengyu Shu<sup>1</sup>, Mojie Duan<sup>2\*</sup>, Yi Zheng<sup>1,3\*</sup>

1 College of Life Science, Fujian Normal University, Fuzhou 350108, China

2 NMR and Molecular Sciences, School of Chemistry and Chemical Engineering, The State Key Laboratory of Refractories and Metallurgy Wuhan University of Science and Technology Wuhan 430081, China

3 National Joint Engineering Research Center of Industrial Microbiology and Fermentation Technology, College of Life Sciences, Fujian Normal University, Fuzhou 350108, China

#### **Corresponding authors**

Yi Zheng, [eyizheng@fjnu.edu.cn](mailto:eyizheng@fjnu.edu.cn)

Mojie Duan, [mduan@wust.edu.cn](mailto:mduan@wust.edu.cn); [mjduan@wipm.ac.cn](mailto:mjduan@wipm.ac.cn)

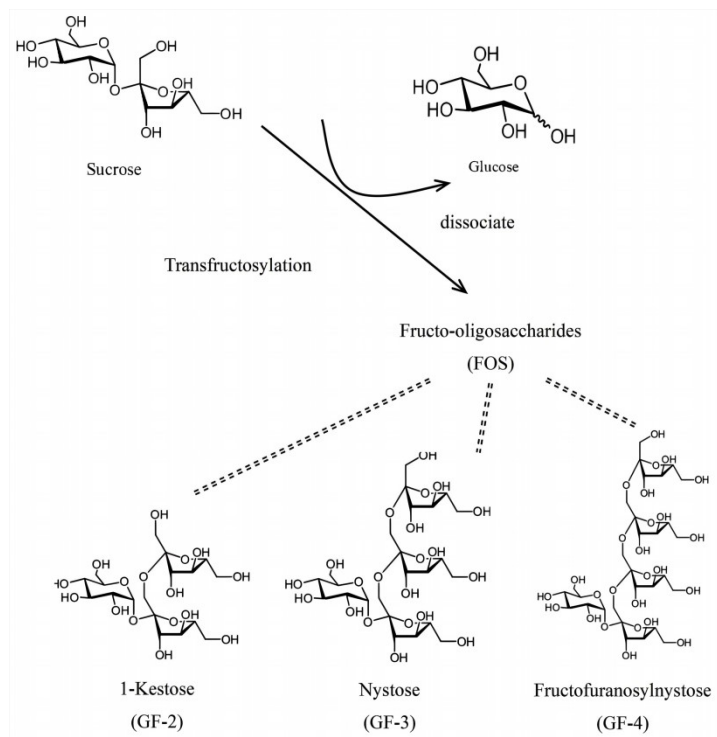

Figure S1. Mechanism of action of fructosyltransferases to generate oligofructose (FOS) by hydrolysis of sucrose as a substrate interacting with trans-fructosylation.

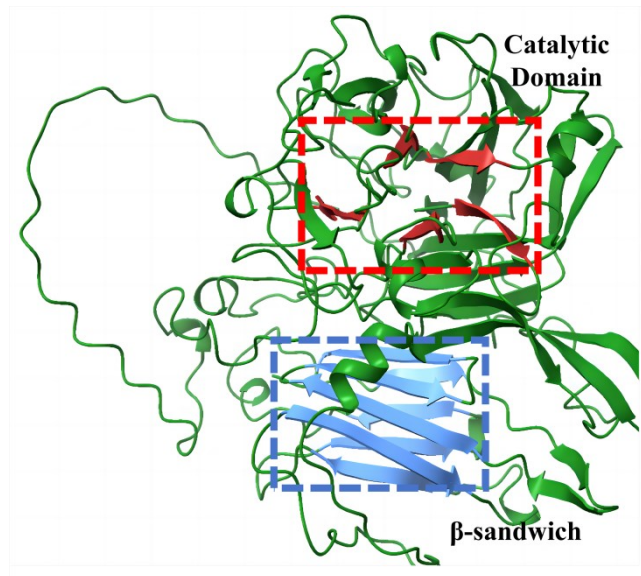

Figure S2. Schematic representation of the QU10-FTase structure.

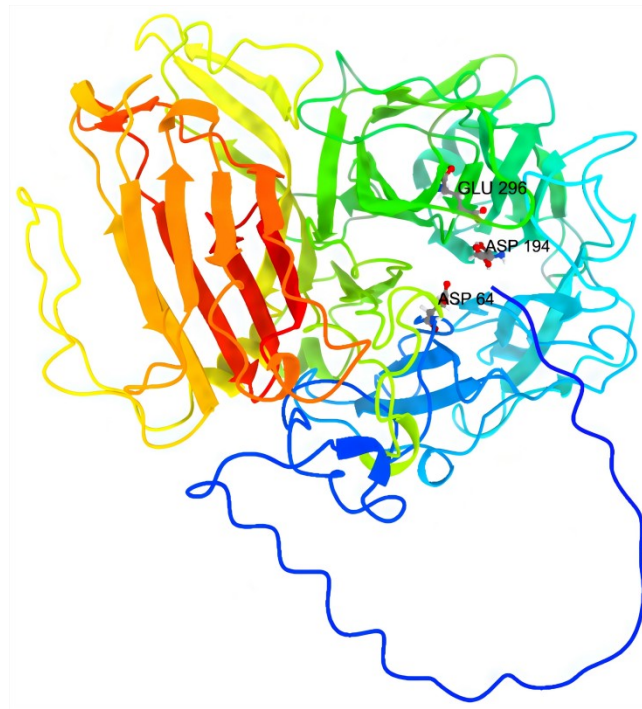

Figure S3. Schematic representation of the three key catalytic sites of QU10-FTase

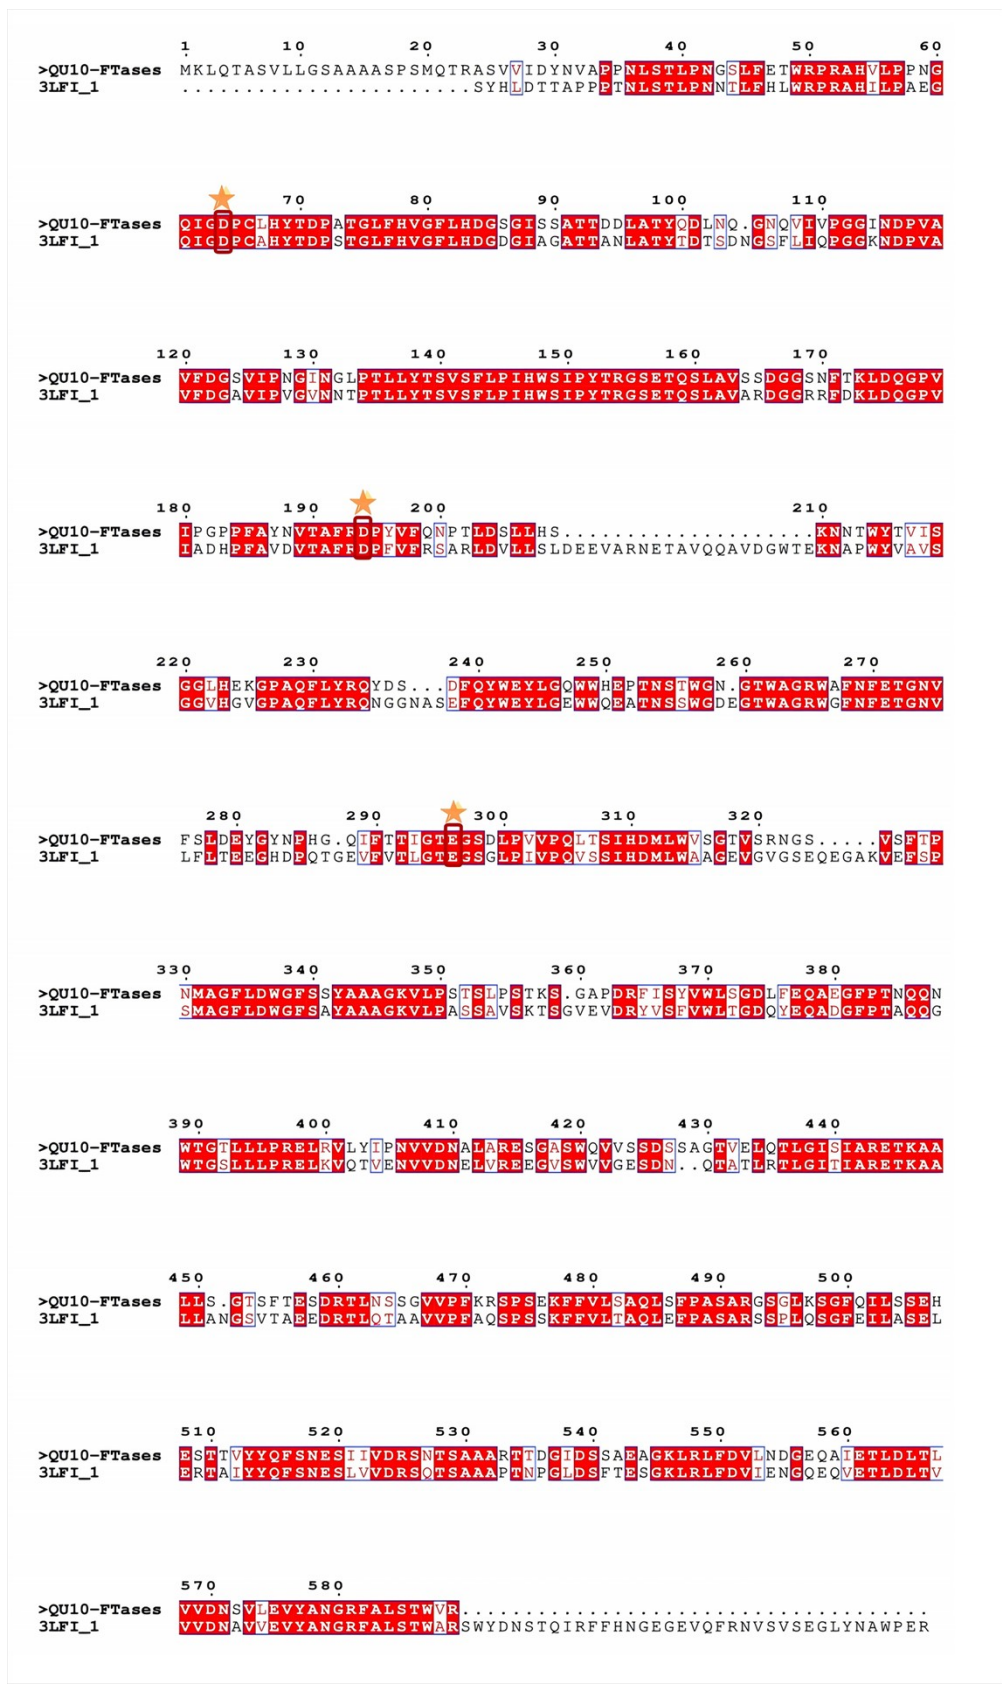

Figure S4. QU10-FTase sequence was compared with the FT sequence of *Aspergillus japonicus*.

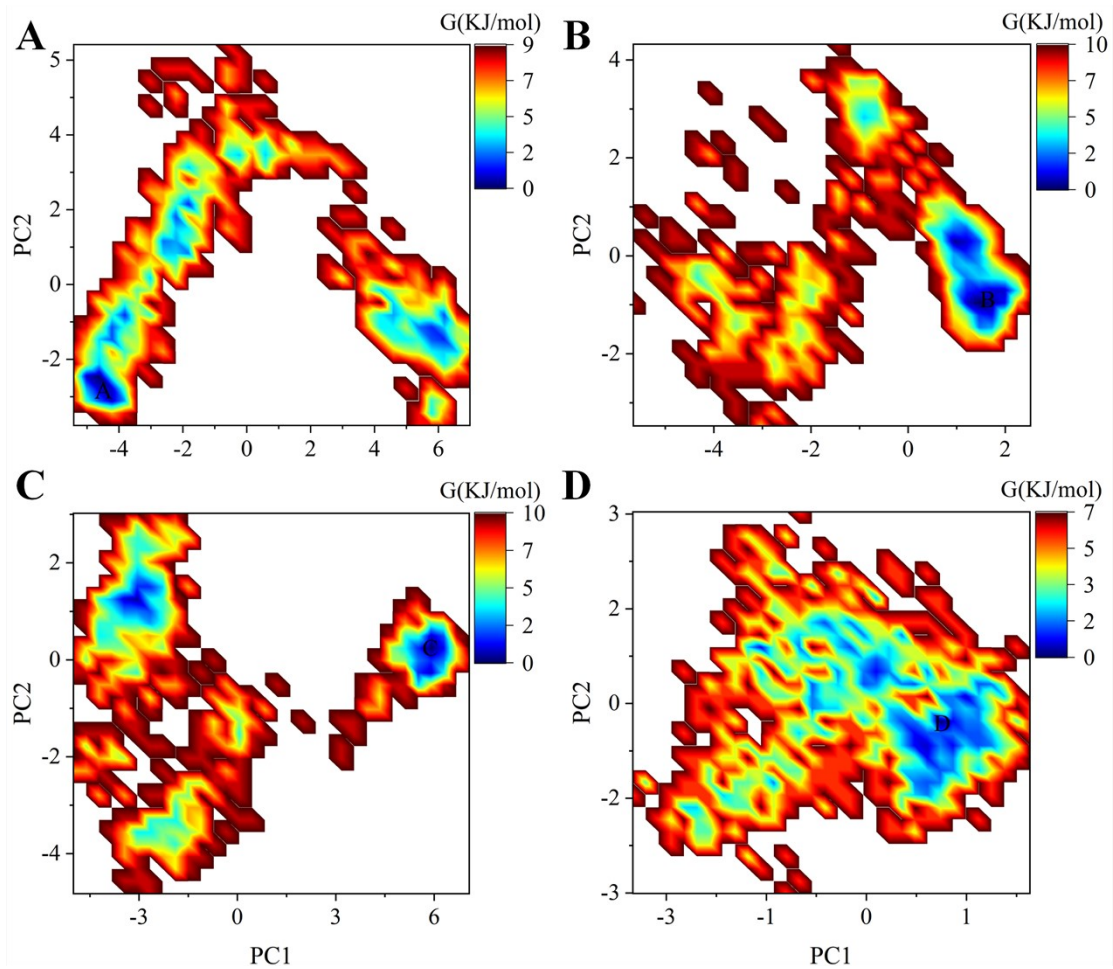

Figure S5. The principal component analysis of QU10-FTase related to the  $\text{Fe}_3\text{O}_4$  interfaces. The different panel figures are corresponding to the systems in Figure 2.

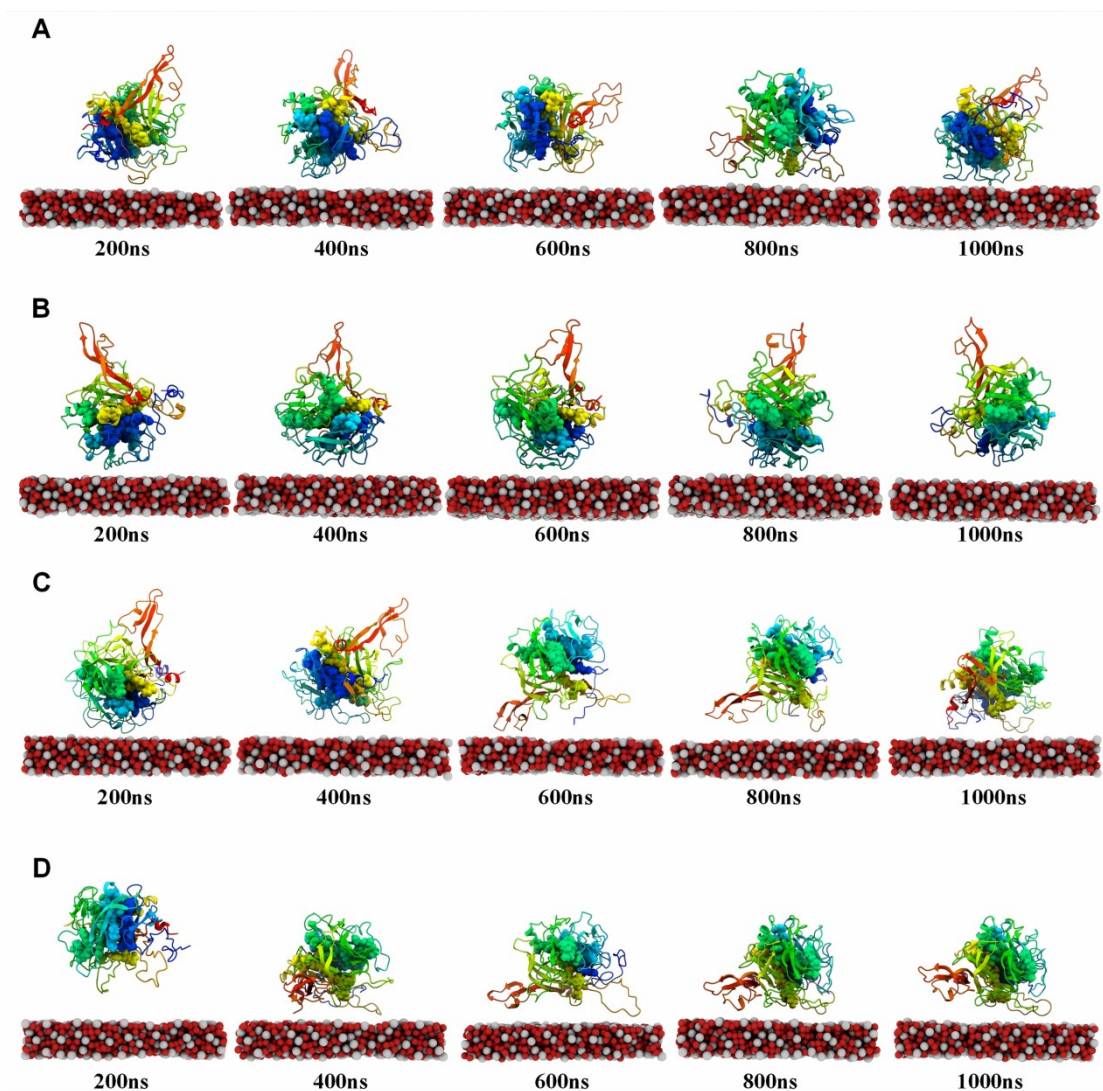

Figure S6. Conformational changes of QU10-FT in different postures at different time points. (A). The conformations of QU10-FT N&C away at 200ns, 400ns, 600ns, 800ns, and 1000ns, respectively. (B). QU10-FT N&C close conformations at 200ns, 400ns, 600ns, 800ns, and 1000ns, respectively. (C). QU10-FT pocket-C down conformations at 200ns, 400ns, 600ns, 800ns, and 1000ns, respectively. (D). The conformation of QU10-FT pocket-N down at 200ns, 400ns, 600ns, 800ns, and 1000ns, respectively.

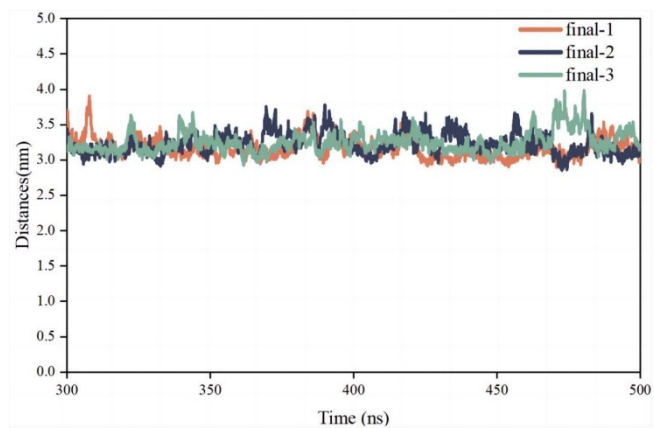

Figure S7. Distance between the center of mass of the  $\beta$ -strand and the  $\text{Fe}_3\text{O}_4$  surface of QU10-FT's 347-349 in three repetitions of the simulation as a function of time.



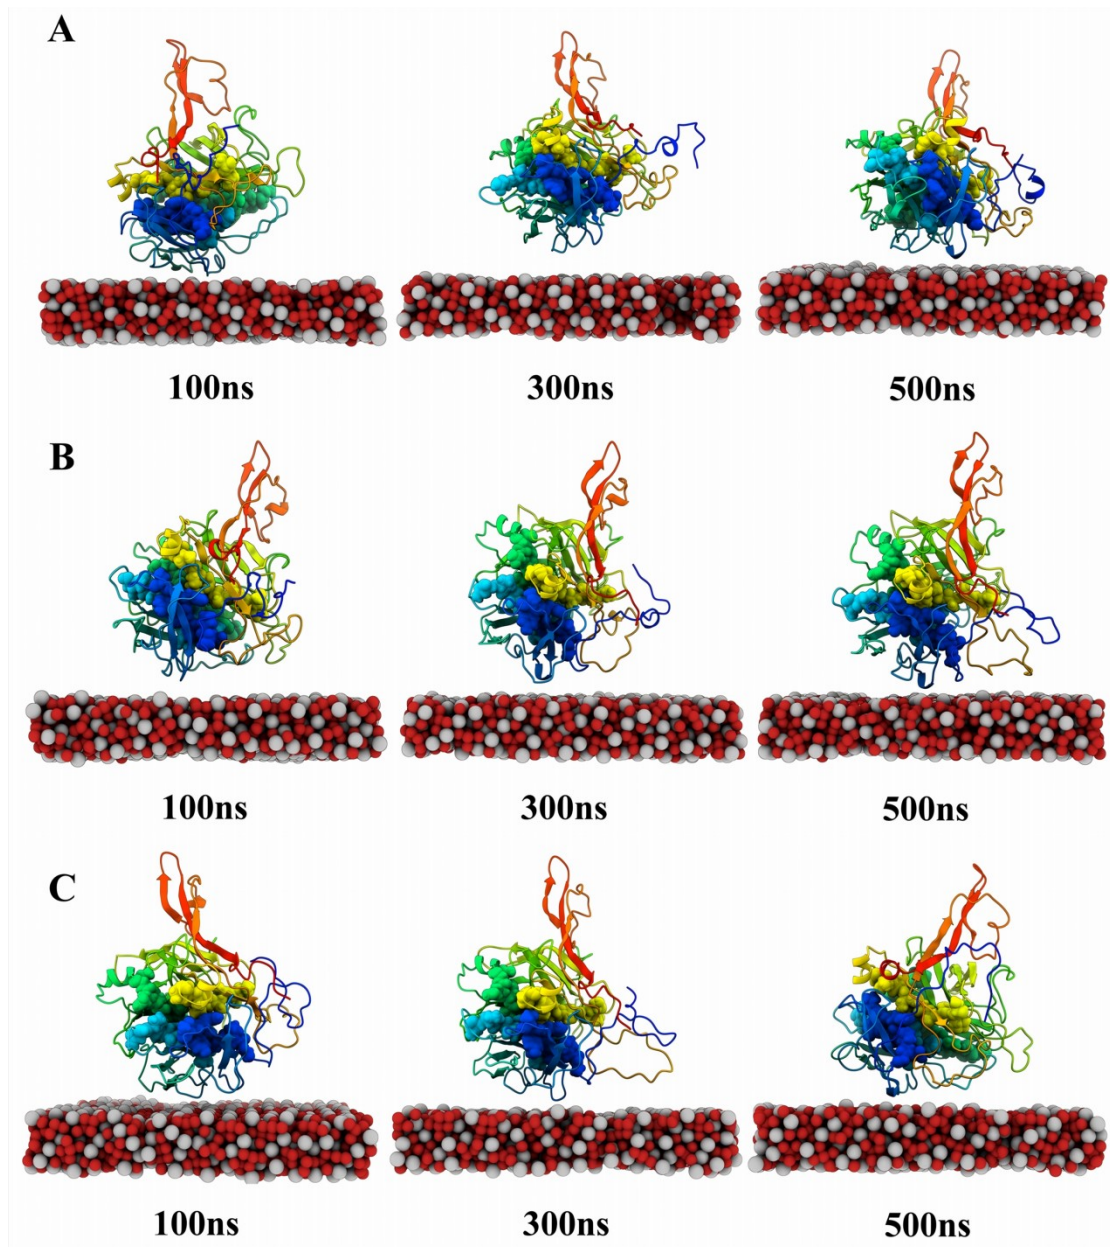

Figure S8. Conformational changes over time for three repetitions of the simulation.

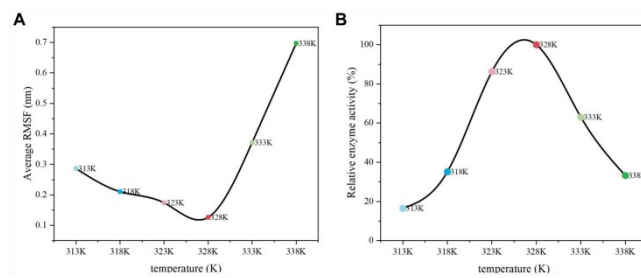

Figure S9. Relative enzyme activities of QU10-FTase and main chain RMSF curves under different temperature conditions.

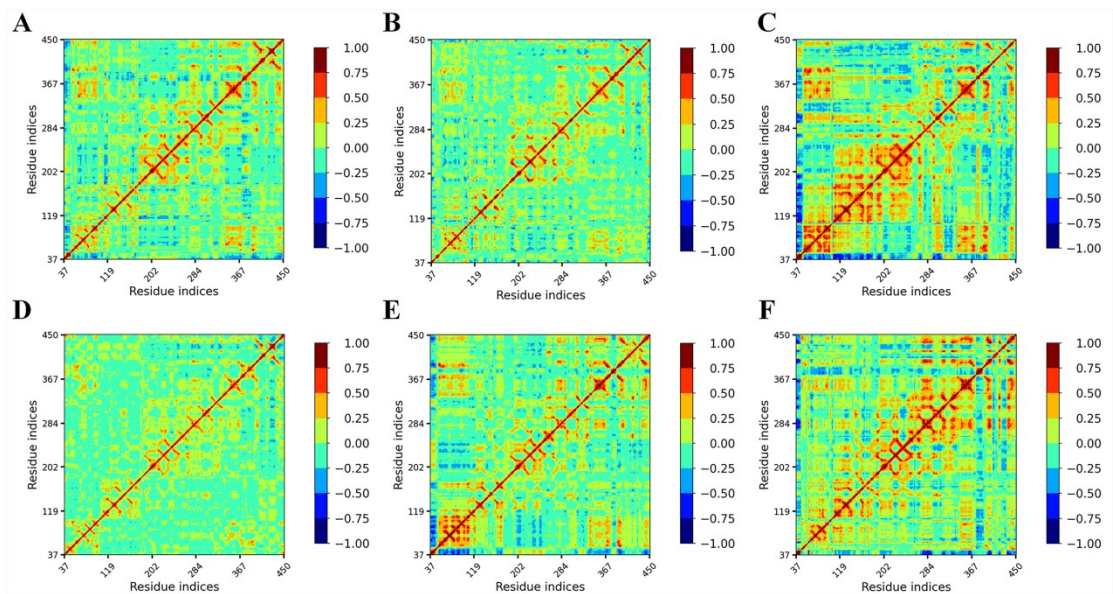

Figure S10. The dynamic correlation-coefficient (DCC) analysis of QU10-FTase under different temperature. (A) 313K; (B) 318K; (C) 323K; (D) 328K; (E) 333K; (F) 338K. The C $\alpha$  atoms of residues were utilized in the analysis.

**Table S1. LJ potential parameters and Morse bond parameters for Fe<sub>3</sub>O<sub>4</sub>**

| ionic            | $\epsilon$ (eV) | $\sigma$ (Å) | De(eV)   | $\alpha$ (Å <sup>-1</sup> ) | $r_0$ (Å) | q (C) |
|------------------|-----------------|--------------|----------|-----------------------------|-----------|-------|
| Fe <sup>2+</sup> | 0.019584        | 3.900        | 3.637717 | 0.621504                    | 2.350     | 1.251 |
| Fe <sup>3+</sup> | 0.000741        | 2.664        | 8.379944 | 0.518692                    | 2.333     | 1.611 |
| O <sup>2-</sup>  | 0.003400        | 3.627        |          |                             |           |       |

**Table S2. Contact sites and contact probabilities between QU10-FTase residues and Fe<sub>3</sub>O<sub>4</sub>.**

| exposure probability | contact site                                                                                                                                                            |
|----------------------|-------------------------------------------------------------------------------------------------------------------------------------------------------------------------|
| 1%~20%               | 47A 59N 60G 101D 102L 103N 116D 131N 133L 144L 145P 146I 150I<br>151P 153T 155G 156S 165S 167G 169S 170N 174L 176Q 303V 304P 374D<br>377E 378Q 379A 381G 382F 383P 387Q |
| 20%~40%              | 107Q 118V 143F 172T 173K 305Q 380E 385N 388N                                                                                                                            |
| 40%~60%              | 61Q 83H 86S 110V 111P 113G 166D 384T                                                                                                                                    |
| 60%~80%              | 104Q 105G 117P                                                                                                                                                          |
| >80%                 | 84D 85G 106N 112G 114I 175D 386Q                                                                                                                                        |
